# Supplementary material
Source: MDPI journal article supplement (https://www.mdpi.com/2673-7051/2/4/36)

## TINJAUAN KESIHATAN REMAJA | NHMS 2017 ADOLESCENT HEALTH SURVEY

### PANDUAN MENGISI BORANG (SILA BACA DENGAN TELITI)

#### GUIDE ON FILLING THE QUESTIONNAIRE (PLEASE READ CAREFULLY)

- a. **JANGAN** tulis **NAMA ANDA** pada kertas soalan mahupun kertas jawapan.

**DO NOT** write **YOUR NAME** on the questionnaire or the answer sheet.

- b. Sila **BACA PERNYATAAN** untuk soalan yang memberikan pernyataan atau definisi sebelum menjawab soalan.

Please **READ STATEMENT** for questions with a preceeding statement or definition before answering.

- c. Sila **HITAMKAN** jawapan yang bersamaan jawapan anda pada kertas jawapan yang disediakan. Hanya hitamkan **SATU JAWAPAN** bagi setiap soalan. Sila gunakan pensel 2B yang disediakan. Sekiranya telah selesai, ikut arahan pegawai yang melakukan survei di sekolah/kelas anda.

Please **FILL IN THE CIRCLES** on your answer sheet that matches your answer. There can be **ONLY ONE ANSWER** for each question. Use only the provided 2B pencil. When you are done, follow the instructions of the person conducting the survey in your school/class

#### BERIKUT ADALAH CONTOH BAGAIMANA MENGISI JAWAPAN

#### HERE IS AN EXAMPLE OF HOW TO FILL IN THE CIRCLE:

ISIKAN BULATAN SEPERTI INI  
FILL IN THE CIRCLES LIKE THIS

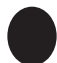

BUKAN SEPERTI INI  
NOT LIKE THIS

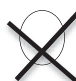

ATAU  
OR

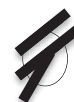

TINJAUAN/SURVEY

1. Adakah ikan tinggal dalam air?  
Do fish live in the water?

- A. Ya  
Yes  
B. Tidak  
No

Borang jawapan  
Answer sheet

1. ☒ ☐ B ☐ C ☐ D ☐ E ☐ F ☐ G ☐ H

TINJAUAN KESIHATAN REMAJA | NHMS 2017  
 ADOLESCENT HEALTH SURVEY

**BAHAGIAN 1**

**PART 1**

1. Berapakah umur anda?  
 How old are you?
  - a. 11 tahun atau ke bawah  
*11 years old or younger*
  - b. 12 tahun  
*12 years old*
  - c. 13 tahun  
*13 years old*
  - d. 14 tahun  
*14 years old*
  - e. 15 tahun  
*15 years old*
  - f. 16 tahun  
*16 years old*
  - g. 17 tahun  
*17 years old*
  - h. 18 tahun atau ke atas  
*18 years old or older*
2. Apakah jantina anda?  
 What is your sex?
  - a. Lelaki  
*Male*
  - b. Perempuan  
*Female*
3. Anda belajar di tingkatan/kelas apa?  
 In what form/class are you?
  - a. Kelas peralihan  
*Remove class*
  - b. Tingkatan 1  
*Form 1*
  - c. Tingkatan 2  
*Form 2*
  - d. Tingkatan 3  
*Form 3*
  - e. Tingkatan 4  
*Form 4*
  - f. Tingkatan 5  
*Form 5*
4. Apakah etnik anda?  
 What is your ethnicity?
  - a. Melayu  
*Malay*
  - b. Cina  
*Chinese*
  - c. India  
*Indian*
  - d. Bumiputera Sabah  
*Bumiputera Sabah*
  - e. Bumiputera Sarawak  
*Bumiputera Sarawak*
  - f. Lain-lain etnik  
*Some other ethnic*
5. Apakah status perkahwinan ibu bapa anda?  
 What is the marital status of your parents?
  - a. Berkahwin dan tinggal bersama  
*Married and living together*
  - b. Berkahwin tetapi tidak tinggal bersama atas dasar bekerja di tempat lain  
*Married but living apart due to working in other place*
  - c. Berceraai  
*Divorced*
  - d. Balu (ayah atau ibu telah meninggal)  
*Widower (my mother or father has died)*
  - e. Berpisah (ibu bapa tidak tinggal serumah)  
*Separated (my parent do not live together)*
  - f. Tidak tahu  
*I do not know*

|                                                       |           |
|-------------------------------------------------------|-----------|
| TINJAUAN KESIHATAN REMAJA<br>ADOLESCENT HEALTH SURVEY | NHMS 2017 |
|-------------------------------------------------------|-----------|

**BAHAGIAN 2**  
**PART 2**

6. Dalam tempoh 30 hari yang lepas, berapa kerap anda kelaparan kerana tidak cukup makanan di rumah?

*During the past 30 days, how often did you go hungry because there was not enough food in your home?*

- a. Tidak pernah  
*Never*
- b. Jarang-jarang  
*Rarely*
- c. Kadang-kadang  
*Sometimes*
- d. Kebanyakan masa  
*Most of the time*
- e. Sentiasa  
*Always*

Enam soalan yang berikutnya adalah berkenaan apa yang anda mungkin makan atau minum.

*The next six questions ask about what you might eat and drink.*

7. Dalam tempoh 30 hari yang lepas, berapa kali dalam sehari anda **biasanya** makan buah?

*During the past 30 days, how many times per day did you **usually** eat fruits?*

- a. Saya tidak makan buah dalam 30 hari yang lepas  
*I did not eat fruits during the past 30 days*
- b. Kurang dari 1 kali sehari  
*Less than 1 time per day*
- c. 1 kali sehari  
*1 time per day*
- d. 2 kali sehari  
*2 times per day*
- e. 3 kali sehari  
*3 times per day*
- f. 4 kali sehari  
*4 times per day*
- g. 5 kali atau lebih sehari  
*5 or more times per day*

8. Dalam tempoh 30 hari yang lepas, berapa kali dalam sehari anda **biasanya** makan sayur?

*During the past 30 days, how many times per day did you **usually** eat vegetables?*

- a. Saya tidak makan sayur dalam 30 hari yang lepas  
*I did not eat vegetables during the past 30 days*
- b. Kurang dari 1 kali sehari  
*Less than 1 time per day*
- c. 1 kali sehari  
*1 time per day*
- d. 2 kali sehari  
*2 times per day*
- e. 3 kali sehari  
*3 times per day*
- f. 4 kali sehari  
*4 times per day*
- g. 5 kali atau lebih sehari  
*5 or more times per day*

9. Dalam tempoh 30 hari yang lepas, berapa kali dalam sehari anda **biasanya** minum air berkarbonat seperti Coca Cola, Sprite, Pepsi dan lain-lain? (Air berkarbonat diet tidak termasuk dalam kumpulan ini)

*During the past 30 days, how many times per day did you **usually** drink carbonated soft drinks such as Coca Cola, Sprite, and Pepsi? (Do not include diet soft drinks)*

- a. Saya tidak minum air berkarbonat dalam 30 hari yang lepas  
*I did not drink carbonated soft drink during the past 30 days*
- b. Kurang dari 1 kali sehari  
*Less than 1 time per day*
- c. 1 kali sehari  
*1 time per day*
- d. 2 kali sehari  
*2 times per day*
- e. 3 kali sehari  
*3 times per day*
- f. 4 kali sehari  
*4 times per day*
- g. 5 kali atau lebih sehari  
*5 or more times per day*

|                                                       |           |
|-------------------------------------------------------|-----------|
| TINJAUAN KESIHATAN REMAJA<br>ADOLESCENT HEALTH SURVEY | NHMS 2017 |
|-------------------------------------------------------|-----------|

10. Dalam tempoh 30 hari yang lepas, berapa kali dalam sehari anda **biasanya** minum air kosong seperti air mineral, air masak atau air paip?

*During the past 30 days, how many times per day did you **usually** drink plain water such as mineral water, boiled water, or tap water?*

- a. Saya tidak minum air kosong dalam 30 hari yang lepas  
*I did not drink plain water during the past 30 days*
- b. Kurang dari 1 kali sehari  
*Less than 1 time per day*
- c. 1 kali sehari  
*1 time per day*
- d. 2 kali sehari  
*2 times per day*
- e. 3 kali sehari  
*3 times per day*
- f. 4 kali sehari  
*4 times per day*
- g. 5 kali atau lebih sehari  
*5 or more times per day*

11. Dalam tempoh 30 hari yang lepas, berapa kali dalam sehari anda **biasanya** minum susu atau makan produk tenusu seperti susu, keju, yogurt dan lain-lain? (Ini tidak termasuk susu pekat manis)

*During the past 30 days, how many times per day did you **usually** drink milk or eat milk products, such as milk, cheese, and yogurt? (This does not include sweetened condensed milk)*

- a. Saya tidak minum susu atau makan produk tenusu dalam 30 hari yang lepas

*I did not drink milk or eat milks products during the past 30 days*

- b. Kurang dari 1 kali sehari  
*Less than 1 time per day*
- c. 1 kali sehari  
*1 time per day*
- d. 2 kali sehari  
*2 times per day*
- e. 3 kali sehari  
*3 times per day*
- f. 4 kali sehari  
*4 times per day*
- g. 5 kali atau lebih sehari  
*5 or more times per day*

12. Dalam tempoh 7 hari yang lepas, berapa hari anda makan makanan segera dari restoran **makanan segera** seperti McDonald, KFC, dan Pizza Hut?

*During the past 7 days, how many days did you eat food from a **fast food** restaurant, such as McDonalds, KFC and Pizza Hut?*

- a. 0 hari  
*0 day*
- b. 1 hari  
*1 day*
- c. 2 hari  
*2 days*
- d. 3 hari  
*3 days*
- e. 4 hari  
*4 days*
- f. 5 hari  
*5 days*
- g. 6 hari  
*6 days*
- h. 7 hari  
*7 days*

|                                                       |                  |
|-------------------------------------------------------|------------------|
| TINJAUAN KESIHATAN REMAJA<br>ADOLESCENT HEALTH SURVEY | <b>NHMS 2017</b> |
|-------------------------------------------------------|------------------|

**BAHAGIAN 3**  
**PART 3**

**6 soalan seterusnya adalah berkenaan amalan pembersihan gigi, lawatan pergigian anda dan juga bagaimana gigi anda memberi kesan kepada aktiviti-aktiviti anda.**

***The 6 next question are about the cleaning of your teeth, your dental visits and also how your teeth affect your activities.***

13. Dalam tempoh 30 hari yang lepas, berapa kali dalam sehari anda membersih atau memberus gigi anda?  
*During the past 30 days, how many times per day did you usually clean or brush your teeth?*

- a. Saya tidak membersih atau memberus gigi dalam 30 hari yang lepas  
*I did not clean or brush my teeth during the past 30 days*
- b. Kurang dari 1 kali sehari  
*Less than 1 time per day*
- c. 1 kali sehari  
*1 time per day*
- d. 2 kali sehari  
*2 times per day*
- e. 3 kali sehari  
*3 times per day*
- f. 4 kali atau lebih dalam sehari  
*4 or more times per day*

14. Adakah anda menggunakan ubat gigi berflourida?  
*Do you use toothpaste that contain fluoride?*

- a. Ya  
*Yes*
- b. Tidak  
*No*
- c. Tidak tahu  
*I do not know*

15. Adakah anda menggunakan flos/benang gigi untuk membersih gigi anda?  
*Do you use dental floss to clean your teeth?*

- a. Ya  
*Yes*
- b. Tidak  
*No*

16. Bilakah kali terakhir anda berjumpa doktor gigi atau jururawat pergigian untuk pemeriksaan, pembersihan gigi atau rawatan pergigian yang lain?  
*When was the last time you saw a dentist or dental nurse for a check-up, teeth cleaning, or other dental treatment?*

- a. Dalam tempoh 12 bulan yang lepas  
*During the past 12 months*
- b. Di antara 12 hingga 24 bulan yang lepas  
*Between 12 and 24 months ago*
- c. Lebih daripada 24 bulan yang lepas  
*More than 24 months ago*
- d. Tidak pernah  
*Never*
- e. Tidak tahu  
*I do not know*

17. Dalam tempoh 12 bulan yang lepas, adakah sakit gigi menyebabkan anda tidak hadir ke kelas atau sekolah?  
*During the past 12 months, did a toothache cause you to miss classes or school?*

- a. Ya  
*Yes*
- b. Tidak  
*No*

18. Adakah anda mengelak untuk senyum atau ketawa kerana risau dengan rupa gigi anda?  
*Do you avoid smiling or laughing because how your teeth look?*

- a. Ya  
*Yes*
- b. Tidak  
*No*

|                                                       |           |
|-------------------------------------------------------|-----------|
| TINJAUAN KESIHATAN REMAJA<br>ADOLESCENT HEALTH SURVEY | NHMS 2017 |
|-------------------------------------------------------|-----------|

**3 soalan seterusnya adalah berkenaan amalan membasuh tangan.**  
***The next 3 questions are about your hand washing practices.***

19. Dalam tempoh 30 hari yang lepas, berapa kerap anda menggunakan sabun semasa membasuh tangan anda?  
*During the past 30 days, how often did you use soap when washing your hands?*

- a. Tidak pernah  
*Never*
- b. Jarang-jarang  
*Rarely*
- c. Kadang-kadang  
*Sometimes*
- d. Kebanyakan masa  
*Most of the time*
- e. Setiap kali  
*Always*

20. Dalam tempoh 30 hari yang lepas, berapa kerap anda membasuh tangan sebelum makan?  
*During the past 30 days, how often did you wash your hands before eating?*

- a. Tidak pernah  
*Never*
- b. Jarang-jarang  
*Rarely*
- c. Kadang-kadang  
*Sometimes*
- d. Kebanyakan masa  
*Most of the time*
- e. Setiap kali  
*Always*

21. Dalam tempoh 30 hari yang lepas, berapa kerap anda membasuh tangan selepas menggunakan tandas?  
*During the past 30 days, how often did you wash your hands after using the toilet?*

- a. Tidak pernah  
*Never*
- b. Jarang-jarang  
*Rarely*
- c. Kadang-kadang  
*Sometimes*
- d. Kebanyakan masa  
*Most of the time*
- e. Setiap kali  
*Always*

|                                                       |           |
|-------------------------------------------------------|-----------|
| TINJAUAN KESIHATAN REMAJA<br>ADOLESCENT HEALTH SURVEY | NHMS 2017 |
|-------------------------------------------------------|-----------|

**BAHAGIAN 4**  
**PART 4**
**SILA BACA PERNYATAAN DI BAWAH:**

Soalan berikutnya adalah berkenaan serangan fizikal. Serangan fizikal berlaku apabila seseorang atau lebih ramai orang menyerang individu lain dengan anggota badan atau senjata seperti kayu dan pisau. Serangan fizikal tidak diambil kira jika dua individu atau pelajar yang sama saiz atau kekuatan bersetuju untuk bergaduh secara fizikal.

**PLEASE READ THE STATEMENT BELOW:**  
*The next question asks about physical attacks. A physical attack occurs when one or more people hurt another person with/without a weapon such as sticks and knife. It is not a physical attack when two individuals or students of about the same strength or power choose to fight each other.*

22. Dalam tempoh 12 bulan yang lepas, berapa kali anda telah diserang secara fizikal?  
*During the past 12 months, how many times were you physically attacked?*
- 0 kali  
*0 times*
  - 1 kali  
*1 time*
  - 2 atau 3 kali  
*2 or 3 times*
  - 4 atau 5 kali  
*4 or 5 times*
  - 6 atau 7 kali  
*6 or 7 times*
  - 8 atau 9 kali  
*8 or 9 times*
  - 10 atau 11 kali  
*10 or 11 times*
  - 12 kali atau lebih  
*12 or more times*

**SILA BACA PERNYATAAN DI BAWAH:**

Soalan seterusnya adalah berkaitan pergaduhan fizikal. Pergaduhan fizikal berlaku apabila dua individu atau pelajar yang sama saiz atau kekuatan bersetuju untuk bergaduh secara fizikal.

**PLEASE READ THE STATEMENT BELOW:**  
*The next question asks about physical fights. A physical fight occurs when two individuals or students of about the same strength or power choose to fight each other.*

23. Dalam tempoh 12 bulan yang lepas, berapa kali anda terlibat dalam pergaduhan secara fizikal?  
*During the past 12 months, how many times were you in physical fight?*
- 0 kali  
*0 times*
  - 1 kali  
*1 time*
  - 2 atau 3 kali  
*2 or 3 times*
  - 4 atau 5 kali  
*4 or 5 times*
  - 6 atau 7 kali  
*6 or 7 times*
  - 8 atau 9 kali  
*8 or 9 times*
  - 10 atau 11 kali  
*10 or 11 times*
  - 12 kali atau lebih  
*12 or more times*

|                                                       |           |
|-------------------------------------------------------|-----------|
| TINJAUAN KESIHATAN REMAJA<br>ADOLESCENT HEALTH SURVEY | NHMS 2017 |
|-------------------------------------------------------|-----------|

**SILA BACA PERNYATAAN DI BAWAH:**

3 soalan seterusnya adalah berkenaan kecederaan serius yang pernah anda alami. Kecederaan serius berlaku apabila anda tidak hadir sekurang-kurangnya satu hari aktiviti yang biasa dilakukan (termasuk sekolah, sukan atau kerja) atau kecederaan yang memerlukan rawatan daripada doktor atau anggota kesihatan.

**PLEASE READ THE STATEMENT BELOW:**

The next 3 questions ask you about serious injuries that happened to you. An injury is serious when it makes you miss at least one full day of usual activities (such as school, sports or a job) or requires treatment by a doctor or medical personnel.

24. Dalam tempoh 12 bulan yang lepas, berapa kali anda mengalami kecederaan serius?

*During the past 12 months, how many times were you seriously injured?*

- a. 0 kali  
*0 times*
- b. 1 kali  
*1 time*
- c. 2 atau 3 kali  
*2 or 3 times*
- d. 4 atau 5 kali  
*4 or 5 times*
- e. 6 atau 7 kali  
*6 or 7 times*
- f. 8 atau 9 kali  
*8 or 9 times*
- g. 10 atau 11 kali  
*10 or 11 times*
- h. 12 kali atau lebih  
*12 or more times*

25. Dalam tempoh 12 bulan yang lepas, apakah kecederaan yang **paling serius** yang anda pernah alami?

*During the past 12 months, what was the **most serious** injury that happened to you?*

- a. Saya tidak mengalami kecederaan dalam tempoh 12 bulan yang lepas  
*I was not seriously injured during the past 12 months*
- b. Patah tulang atau sendi terkehel/terkeluar  
*I had a broken bone or a dislocated joint*
- c. Luka atau tikaman  
*I had a cut or stab wound*
- d. Gegaran (konkusi) kepala atau kecederaan leher, pengsan atau tidak boleh bernafas  
*I had a concussion or other head or neck injury, was knocked out or could not breathe*
- e. Kebakaran kulit yang serius  
*I had a bad burn*
- f. Diracun atau mengambil ubat berlebihan  
*I was poisoned or took too much of a drug*
- g. Sesuatu yang lain berlaku kepada saya  
*Something else happened to me*



## TINJAUAN KESIHATAN REMAJA | NHMS 2017

### ADOLESCENT HEALTH SURVEY

26. Dalam tempoh 12 bulan yang lepas, apakah penyebab utama terhadap kecederaan serius yang anda alami?

*During the past 12 months, what was the major cause of the most serious injury that happened to you?*

- a. Saya tidak mengalami kecederaan dalam 12 bulan yang lepas  
*I was not seriously injured during the past 12 months*
- b. Saya terlibat dalam kemalangan melibatkan kenderaan  
*I was in a motor vehicle accident or hit by a motor vehicle*
- c. Saya terjatuh  
*I fell*
- d. Sesuatu telah jatuh atau terkena saya  
*Something fell on me or hit me*
- e. Saya telah diserang atau didera atau bergaduh dengan orang lain  
*I was attacked or abused or was fighting with someone*
- f. Saya terlibat dalam kebakaran atau berada terlalu dekat dengan api atau sesuatu yang panas  
*I was in the fire or too near a flame or something hot*
- g. Saya sedut atau telan sesuatu yang membahayakan saya  
*I inhaled or swallowed something bad for me*
- h. Sesuatu yang lain menyebabkan kecederaan saya  
*Something else caused my injury*

#### SILA BACA PERNYATAAN DI BAWAH:

2 soalan seterusnya adalah berkenaan buli. Buli berlaku apabila seseorang atau sekumpulan pelajar mengata atau melakukan sesuatu yang tidak menyenangkan pelajar lain. Seseorang juga boleh dikatakan dibuli apabila dia diejek secara berterusan atau dipulaukan dengan sengaja. Buli tidak diambil kira apabila dua pelajar yang sama saiz atau kekuatan bergaduh atau ejekan dilakukan secara bergurau atau berseronok bagi *kedua-dua pihak*.

#### PLEASE READ THE STATEMENT BELOW:

The next 2 questions ask about bullying. Bullying occurs when a student or group of students say or do bad and unpleasant things to another student. It is also bullying when a student is teased a lot in an unpleasant way or when a student is left out of things on purpose. It is not bullying when two students of about the same strength or power argue or fight or when teasing is done in a friendly and fun way.

27. Dalam tempoh 30 hari yang lepas, berapa hari anda telah dibuli?

*During the past 30 days, on how many days were you bullied?*

- a. 0 hari  
*0 days*
- b. 1 atau 2 hari  
*1 or 2 days*
- c. 3 hingga 5 hari  
*3 to 5 days*
- d. 6 hingga 9 hari  
*6 to 9 days*
- e. 10 hingga 19 hari  
*10 to 19 days*
- f. 20 hingga 29 hari  
*20 to 29 days*
- g. Kesemua 30 hari  
*All 30 days*

## TINJAUAN KESIHATAN REMAJA | NHMS 2017

### ADOLESCENT HEALTH SURVEY

28. Dalam 30 hari yang lepas, apakah perlakuan buli **paling kerap** anda alami?  
*During the past 30 days, how were you bullied **most often**?*

- a. Saya tidak dibuli dalam 30 hari yang lepas  
*I was not bullied during the past 30 days*
- b. Saya telah dipukul, ditendang, ditolak atau dikunci dalam suatu tempat  
*I was hit, kicked, punched, shoved around, or locked indoors*
- c. Saya telah diejek kerana bangsa, kerakyatan atau warna kulit saya  
*I was made fun of because of my race, nationality or colour*
- d. Saya telah diejek kerana agama saya  
*I was made fun of because of my religion*
- e. Saya telah diejek dengan ejekan seksual seperti secara komen, perilaku atau gurauan  
*I was made fun of with sexual jokes, comments or gestures*
- f. Saya telah dipulau dari apa-apa aktiviti secara sengaja atau langsung tidak dipedulikan  
*I was left out of activities on purpose or completely ignored*
- g. Saya diejek kerana bentuk badan atau paras rupa saya  
*I was made fun of because of how my body or face looks*
- h. Saya telah dibuli dengan cara lain  
*I was bullied in some other way*

**SILA BACA PERNYATAAN DI BAWAH:**

**2 soalan berikutnya adalah berkenaan deraan fizikal dan lisan di rumah. Apabila seseorang memukul atau mengatakan ayat yang menyakitkan hati ia diambil kira sebagai deraan fizikal atau lisan.**

**PLEASE READ THE STATEMENT BELOW:**

**The next 2 questions ask about physical and verbal abuse at home. When someone hits you or says hurtful or insulting things to you it is called physical abuse or verbal abuse.**

29. Dalam tempoh 30 hari yang lepas, adakah anda telah dipukul di rumah sehingga meninggalkan kesan atau mengalami kecederaan?  
*During the past 30 days, how many times did someone at home hit you so hard that they left a mark or caused an injury?*

- a. 0 kali  
*0 times*
- b. 1 kali  
*1 time*
- c. 2 atau 3 kali  
*2 or 3 times*
- d. 4 atau 5 kali  
*4 or 5 times*
- e. 6 atau 7 kali  
*6 or 7 times*
- f. 8 atau 9 kali  
*8 or 9 times*
- g. 10 atau 11 kali  
*10 or 11 times*
- h. 12 kali atau lebih  
*12 or more times*

**TINJAUAN KESIHATAN REMAJA** | **NHMS 2017**  
**ADOLESCENT HEALTH SURVEY**

30. Dalam tempoh 30 hari yang lepas, berapa kali seseorang di rumah menyatakan sesuatu yang menyakitkan hati atau menghina anda?

*During the past 30 days, how many times has someone at home said hurtful or insulting things to you?*

- a. 0 kali  
*0 times*
- b. 1 kali  
*1 time*
- c. 2 atau 3 kali  
*2 or 3 times*
- d. 4 atau 5 kali  
*4 or 5 times*
- e. 6 atau 7 kali  
*6 or 7 times*
- f. 8 atau 9 kali  
*8 or 9 times*
- g. 10 atau 11 kali  
*10 or 11 times*
- h. 12 kali atau lebih  
*12 or more times*

## TINJAUAN KESIHATAN REMAJA | NHMS 2017

### ADOLESCENT HEALTH SURVEY

#### BAHAGIAN 5 PART 5

6 soalan seterusnya adalah berkenaan perasaan dan persahabatan anda.

*The next 6 questions ask about your feelings and friendships.*

- |                                                                                                                                                                                                                                                                                                                                                                                                                                                                                                                                                                                                                                                                                                                                                                                                                                                                                                                                                                                                                                                                                                                                                                                                                                                                                                                         |                                                                                                                                                                                                                                                                                                                                                                                                                                                                                                                                                                                                                                                                                                                                                                                                                                                                                                                                                                                                                                                                                                    |
|-------------------------------------------------------------------------------------------------------------------------------------------------------------------------------------------------------------------------------------------------------------------------------------------------------------------------------------------------------------------------------------------------------------------------------------------------------------------------------------------------------------------------------------------------------------------------------------------------------------------------------------------------------------------------------------------------------------------------------------------------------------------------------------------------------------------------------------------------------------------------------------------------------------------------------------------------------------------------------------------------------------------------------------------------------------------------------------------------------------------------------------------------------------------------------------------------------------------------------------------------------------------------------------------------------------------------|----------------------------------------------------------------------------------------------------------------------------------------------------------------------------------------------------------------------------------------------------------------------------------------------------------------------------------------------------------------------------------------------------------------------------------------------------------------------------------------------------------------------------------------------------------------------------------------------------------------------------------------------------------------------------------------------------------------------------------------------------------------------------------------------------------------------------------------------------------------------------------------------------------------------------------------------------------------------------------------------------------------------------------------------------------------------------------------------------|
| <p>31. Dalam tempoh 12 bulan yang lepas, berapa kerap anda merasa kesunyian?<br/><i>During the past 12 months, how often have you felt lonely?</i></p> <ul style="list-style-type: none"> <li>a. Tidak pernah<br/><i>Never</i></li> <li>b. Jarang-jarang<br/><i>Rarely</i></li> <li>c. Kadang-kadang<br/><i>Sometimes</i></li> <li>d. Kebanyakan masa<br/><i>Most of the time</i></li> <li>e. Setiap masa<br/><i>Always</i></li> </ul> <p>32. Dalam tempoh 12 bulan yang lepas, berapa kerap anda merasa terlalu risau tentang sesuatu perkara sehingga anda tidak dapat tidur di waktu malam?<br/><i>During the past 12 months, how often have you been so worried about something that you could not sleep at night?</i></p> <ul style="list-style-type: none"> <li>a. Tidak pernah<br/><i>Never</i></li> <li>b. Jarang-jarang<br/><i>Rarely</i></li> <li>c. Kadang-kadang<br/><i>Sometimes</i></li> <li>d. Kebanyakan masa<br/><i>Most of the time</i></li> <li>e. Setiap masa<br/><i>Always</i></li> </ul> <p>33. Dalam tempoh 12 bulan yang lepas, pernahkah anda terfikir secara serius untuk membunuh diri?<br/><i>During the past 12 months, did you ever seriously consider attempting suicide?</i></p> <ul style="list-style-type: none"> <li>a. Ya<br/><i>Yes</i></li> <li>b. Tidak<br/><i>No</i></li> </ul> | <p>34. Dalam tempoh 12 bulan yang lepas, adakah anda membuat perancangan untuk membunuh diri?<br/><i>During the past 12 months, did you make a plan about how you would attempt suicide?</i></p> <ul style="list-style-type: none"> <li>a. Ya<br/><i>Yes</i></li> <li>b. Tidak<br/><i>No</i></li> </ul> <p>35. Dalam tempoh 12 bulan yang lepas, berapa kali anda telah cuba untuk membunuh diri?<br/><i>During the past 12 months, how many times did you actually attempt suicide?</i></p> <ul style="list-style-type: none"> <li>a. 0 kali<br/><i>0 times</i></li> <li>b. 1 kali<br/><i>1 time</i></li> <li>c. 2 atau 3 kali<br/><i>2 or 3 times</i></li> <li>d. 4 hingga 5 kali<br/><i>4 to 5 times</i></li> <li>e. 6 kali atau lebih<br/><i>6 or more times</i></li> </ul> <p>36. Berapa ramai kawan rapat yang anda ada?<br/><i>How many close friends do you have?</i></p> <ul style="list-style-type: none"> <li>a. 0 kawan<br/><i>0 friends</i></li> <li>b. 1 kawan<br/><i>1 friend</i></li> <li>c. 2 kawan<br/><i>2 friends</i></li> <li>d. 3 atau lebih<br/><i>3 or more</i></li> </ul> |
|-------------------------------------------------------------------------------------------------------------------------------------------------------------------------------------------------------------------------------------------------------------------------------------------------------------------------------------------------------------------------------------------------------------------------------------------------------------------------------------------------------------------------------------------------------------------------------------------------------------------------------------------------------------------------------------------------------------------------------------------------------------------------------------------------------------------------------------------------------------------------------------------------------------------------------------------------------------------------------------------------------------------------------------------------------------------------------------------------------------------------------------------------------------------------------------------------------------------------------------------------------------------------------------------------------------------------|----------------------------------------------------------------------------------------------------------------------------------------------------------------------------------------------------------------------------------------------------------------------------------------------------------------------------------------------------------------------------------------------------------------------------------------------------------------------------------------------------------------------------------------------------------------------------------------------------------------------------------------------------------------------------------------------------------------------------------------------------------------------------------------------------------------------------------------------------------------------------------------------------------------------------------------------------------------------------------------------------------------------------------------------------------------------------------------------------|

## TINJAUAN KESIHATAN REMAJA ADOLESCENT HEALTH SURVEY | NHMS 2017

### BAHAGIAN 6 PART 6

#### Rokok dan produk tembakau yang lain. *Cigarettes and other cigarette products.*

37. Berapakah umur anda ketika kali pertama menghisap rokok?  
*How old were you when you first tried a cigarette?*

- a. Saya tidak pernah merokok  
*I have never smoked cigarettes*
- b.   tahun/ *years old*

38. Dalam tempoh 30 hari yang lepas, berapa hari anda merokok?  
*During the past 30 days, on how many days did you smoke cigarettes?*

- a. 0 hari  
*0 days*
- b. 1 atau 2 hari  
*1 or 2 days*
- c. 3 hingga 5 hari  
*3 to 5 days*
- d. 6 hingga 9 hari  
*6 to 9 days*
- e. 10 hingga 19 hari  
*10 to 19 days*
- f. 20 hingga 29 hari  
*20 to 29 days*
- g. Kesemua 30 hari  
*All 30 days*

39. Dalam tempoh 30 hari yang lepas, adakah anda menggunakan mana-mana produk seperti di bawah?  
*During the past 30 days, did you use any of the products listed below?*

39.1 Shisha/Shisha

- a. Ya/Yes
- b. Tidak/No

39.2 Rokok Daun/*Traditional hand-rolled cigarette*

- a. Ya/Yes
- b. Tidak/No

39.3 Rokok gulung sendiri dengan kertas rokok/"Roll-your-own" with cigarette paper

- a. Ya/Yes
- b. Tidak/No

39.4 Cerut/ Cigar

- a. Ya/Yes
- b. Tidak/No

39.5 Hisap paip/*Pipe smoking*

- a. Ya/Yes
- b. Tidak/No

39.6 Rokok elektronik atau vape/*E-cigarettes or vape*

- a. Ya/Yes
- b. Tidak/No

39.7 Mengunyah tembakau (Sentil atau songel)/*Chewing tobacco*

- a. Ya/Yes
- b. Tidak/No

39.8 Menghidu tembakau/*Snuff*

- a. Ya/Yes
- b. Tidak/No

## TINJAUAN KESIHATAN REMAJA | NHMS 2017

### ADOLESCENT HEALTH SURVEY

40. Dalam tempoh 12 bulan yang lepas, adakah anda cuba untuk berhenti merokok?  
*During the past 12 months, have you ever tried to stop smoking cigarettes?*
- Saya tidak pernah merokok  
*I have never smoked cigarettes*
  - Saya tidak pernah merokok dalam tempoh 12 bulan yang lepas  
*I did not smoke cigarettes during the past 12 months*
  - Ya  
*Yes*
  - Tidak  
*No*
41. Dalam tempoh 7 hari yang lepas, berapa hari anda bersama dengan perokok yang sedang merokok?  
*During the past 7 days, on how many days have people smoked in your presence?*
- 0 hari  
*0 days*
  - 1 atau 2 hari  
*1 or 2 days*
  - 3 atau 4 hari  
*3 or 4 days*
  - 5 atau 6 hari  
*5 or 6 days*
  - Kesemua 7 hari  
*All 7 days*
42. Siapa antara bapa, ibu atau penjaga yang menggunakan produk tembakau termasuk rokok?  
*Which of your parents or guardians use any form of tobacco including cigarettes?*
- Kedua-duanya tidak merokok  
*Neither*
  - Ayah atau penjaga lelaki  
*My father or male guardian*
  - Ibu atau penjaga perempuan  
*My mother or female guardian*
  - Kedua-duanya  
*Both*
  - Tidak tahu  
*I do not know*
43. Berapakah umur anda ketika mula-mula menggunakan rokok elektronik/vape?  
*How old were you when you first tried using e-cigarettes/vape?*
- Saya tidak pernah gunakan rokok elektronik/vape  
*I have never tried using e-cigarettes/vape*
  - tahun/ years old
44. Dalam tempoh 30 hari yang lepas, berapa hari anda telah menggunakan rokok elektronik/vape?  
*During the past 30 days, on how many days did you use e-cigarettes/vape?*
- 0 hari  
*0 days*
  - 1 atau 2 hari  
*1 or 2 days*
  - 3 hingga 5 hari  
*3 to 5 days*
  - 6 hingga 9 hari  
*6 to 9 days*
  - 10 hingga 19 hari  
*10 to 19 days*
  - 20 hingga 29 hari  
*20 to 29 days*
  - Kesemua 30 hari  
*All 30 days*

|                                                                     |                  |
|---------------------------------------------------------------------|------------------|
| <b>TINJAUAN KESIHATAN REMAJA</b><br><b>ADOLESCENT HEALTH SURVEY</b> | <b>NHMS 2017</b> |
|---------------------------------------------------------------------|------------------|

45. Dalam tempoh 12 bulan yang lepas, adakah anda cuba untuk berhenti menggunakan rokok elektronik/vape?

*During the past 12 months, did you ever try to stop using e-cigarettes/vape?*

- a. Saya tidak pernah menggunakan rokok elektronik/ vape  
*I have never used e-cigarettes/vape*
- b. Saya tidak pernah menggunakan rokok elektronik/ vape dalam tempoh 12 bulan yang lepas  
*I don't use e-cigarettes/vape in the past 12 months*
- c. Ya  
*Yes*
- d. Tidak  
*No*

46. Siakah antara bapa, ibu atau penjaga anda menggunakan rokok elektronik/vape?

*Which of your parents or guardians use e-cigarettes/vape?*

- a. Kedua-duanya tidak merokok  
*Neither*
- b. Ayah atau penjaga lelaki  
*My father or male guardian*
- c. Ibu atau penjaga perempuan  
*My mother or female guardian*
- d. Kedua-duanya  
*Both*
- e. Tidak tahu  
*I do not know*

|                                                       |                  |
|-------------------------------------------------------|------------------|
| TINJAUAN KESIHATAN REMAJA<br>ADOLESCENT HEALTH SURVEY | <b>NHMS 2017</b> |
|-------------------------------------------------------|------------------|

**BAHAGIAN 7**  
**PART 7**
**SILA BACA PERNYATAAN DI BAWAH:**

6 soalan berikutnya adalah berkenaan meminum minuman beralkohol. Satu “minuman merujuk kepada satu gelas wain, tuak, lihing, bahar, ijuk atau todi; sebotol bir, segelas kecil arak, langkau, montoku; atau minuman campuran. Minuman beralkohol tidak termasuk beberapa hirup wain untuk tujuan keagamaan.

**PLEASE READ THE STATEMENT BELOW:**

*The next 6 questions ask about drinking alcohol. A “drink” is a glass of wine, tuak, lihing, bahar, ijuk or toddy; a bottle of beer, a small glass of liquor or mixed drink. Drinking alcohol does not include drinking a few sip of wine for religious purposes.*

47. Berapakah umur anda ketika kali pertama anda minum minuman beralkohol?

*How old were you when you had your first drink of alcohol?*

a. Saya tidak pernah minum minuman beralkohol

*I have never had a drink of alcohol*

b. 7 tahun atau ke bawah

*7 years old or younger*

c. 8 atau 9 tahun

*8 or 9 years old*

d. 10 atau 11 tahun

*10 or 11 years old*

e. 12 atau 13 tahun

*12 or 13 years old*

f. 14 atau 15 tahun

*14 or 15 years old*

g. 16 tahun atau ke atas

*16 years old or older*

48. Dalam tempoh 30 hari yang lepas, berapa hari anda mengambil sekurang-kurangnya satu minuman mengandungi alkohol?

*During the past 30 days, on how many days did you have at least one drink containing alcohol?*

a. 0 hari

*0 days*

b. 1 atau 2 hari

*1 or 2 days*

c. 3 hingga 5 hari

*3 to 5 days*

d. 6 hingga 9 hari

*6 to 9 days*

e. 10 hingga 19 hari

*10 to 19 days*

f. 20 hingga 29 hari

*20 to 29 days*

g. Kesemua 30 hari

*All 30 days*



## TINJAUAN KESIHATAN REMAJA | NHMS 2017

### ADOLESCENT HEALTH SURVEY

49. Dalam tempoh 30 hari yang lepas, pada hari anda minum minuman alkohol; berapa banyak minuman yang anda **biasa** ambil dalam sehari?

*During the past 30 days, on the day you drank alcohol, how many drinks did you usually drink per day?*

- a. Saya tidak minum minuman beralkohol dalam 30 hari yang lepas  
*I did not drink alcohol during the past 30 days*
- b. Kurang dari 1 minuman  
*Less than one drink*
- c. 1 minuman  
*1 drink*
- d. 2 minuman  
*2 drinks*
- e. 3 minuman  
*3 drinks*
- f. 4 minuman  
*4 drinks*
- g. 5 minuman atau lebih  
*5 or more drinks*

50. Dalam tempoh 30 hari yang lepas, biasanya bagaimana anda mendapatkan minuman beralkohol? **SILA PILIH SATU JAWAPAN SAHAJA**

*During the past 30 days, how did you usually get the alcohol you drank? **SELECT ONLY ONE RESPONSE***

- a. Saya tidak minum minuman beralkohol dalam 30 hari yang lepas  
*I did not drink alcohol during the past 30 days*
- b. Saya beli dari kedai atau gerai  
*I brought it in a store, shop or from a street vendor*
- c. Saya beri duit kepada orang lain untuk membeli  
*I gave someone else money to buy it for me*
- d. Saya dapat daripada kawan  
*I got it from my friend*
- e. Saya dapat daripada keluarga saya  
*I got it from my family*
- f. Saya curi atau ambil tanpa kebenaran  
*I stole it or got it without permission*
- g. Saya perolehi dari cara lain  
*I got it some other way*

#### SILA BACA PERNYATAAN DI BAWAH:

**Terhuyung-hayang semasa berjalan, tidak mampu bercakap dengan betul, dan muntah adalah tanda seseorang itu terlalu mabuk.**

**PLEASE READ THE STATEMENT BELOW?**  
**Staggering when walking, not being able to speak right, and throwing up are some signs of being really drunk.**

51. Sepanjang hidup anda berapa kali anda minum minuman beralkohol berlebihan sehingga betul-betul mabuk?

*During your life, how many times did you drink so much alcohol that you were really drunk?*

- a. 0 kali  
*0 times*
- b. 1 atau 2 kali  
*1 or 2 times*
- c. 3 hingga 9 kali  
*3 or 9 times*
- d. 10 kali atau lebih  
*10 or more times*

52. Sepanjang hidup anda, berapa kali anda mendapat masalah dengan ahli keluarga atau kawan, tidak ke sekolah, atau bertumbuk, akibat daripada minum minuman beralkohol?

*During your life, how many times have you got into trouble with your family or friends, missed school, or got into fights, as a result of drinking alcohol?*

- a. 0 kali  
*0 times*
- b. 1 atau 2 kali  
*1 or 2 times*
- c. 3 hingga 9 kali  
*3 or 9 times*
- d. 10 kali atau lebih  
*10 or more times*

## TINJAUAN KESIHATAN REMAJA | NHMS 2017

### ADOLESCENT HEALTH SURVEY

#### BAHAGIAN 8 PART 8

##### SILA BACA PERNYATAAN DI BAWAH:

4 soalan berikutnya adalah berkenaan penggunaan dadah termasuk heroin, morfin, gam, amfitamin, ecstasy, syabu, ice dan ganja. Ini tidak termasuk ubat-ubatan preskripsi.

##### PLEASE READ THE STATEMENT BELOW:

The next 4 questions ask about drug use. This include heroin, morphine, glue, amphetamine, ecstasy, methamphetamine, ice and marijuana . This does not include prescribed medicine.

53. Berapakah umur anda ketika **pertama kali** anda menggunakan dadah?  
*How old were you when you **first** used drugs?*

- a. Saya tidak pernah menggunakan dadah  
*I have never used drugs*
- b. 7 tahun atau ke bawah  
*7 years old or younger*
- c. 8 atau 9 tahun  
*8 or 9 years old*
- d. 10 atau 11 tahun  
*10 or 11 years old*
- e. 12 atau 13 tahun  
*12 or 13 years old*
- f. 14 atau 15 tahun  
*14 or 15 years old*
- g. 16 tahun atau ke atas  
*16 years old or older*

54. Sepanjang hidup anda, berapa kali anda telah menggunakan dadah?  
*During your life, how many times have you used drugs?*

- a. 0 kali  
*0 times*
- b. 1 atau 2 kali  
*1 or 2 times*
- c. 3 hingga 9 kali  
*3 or 9 times*
- d. 10 hingga 19 kali  
*10 to 19 times*
- e. 20 kali atau lebih  
*20 or more times*

55. Dalam tempoh 30 hari yang lepas, berapa kali anda menggunakan dadah?  
*During the past 30 days, how many times have you used drugs?*

- a. 0 kali  
*0 times*
- b. 1 atau 2 kali  
*1 or 2 times*
- c. 3 hingga 9 kali  
*3 or 9 times*
- d. 10 hingga 19 kali  
*10 to 19 times*
- e. 20 kali atau lebih  
*20 or more times*

56. Dalam tempoh 30 hari yang lepas, bagaimana biasanya anda mendapatkan dadah yang anda gunakan? SILA PILIH SATU JAWAPAN SAHAJA

*During the past 30 days, how did you usually get the drugs used? SELECT ONLY ONE RESPONSE*

- a. Saya tidak menggunakan dadah dalam 30 hari yang lepas  
*I did not use drugs during the past 30 days*
- b. Saya beli dari orang lain  
*I bought them from someone*
- c. Saya beri duit kepada orang lain untuk membeli  
*I gave someone else money to buy it for me*
- d. Saya mencuri atau mengambil tanpa kebenaran  
*I stole it or got it without permission*
- e. Saya mendapatkannya daripada kawan saya  
*I got it from my friend*
- f. Saya mendapatkannya daripada keluarga saya  
*I got it from my family*
- g. Saya memperolehi dari cara lain  
*I got it some other ways*

|                                                                                        |
|----------------------------------------------------------------------------------------|
| <b>TINJAUAN KESIHATAN REMAJA</b><br><b>ADOLESCENT HEALTH SURVEY</b>   <b>NHMS 2017</b> |
|----------------------------------------------------------------------------------------|

57. Sepanjang hidup anda, berapa kali anda telah menggunakan ganja?

*During your life, how many times have you used marijuana?*

- a. 0 kali  
*0 times*
- b. 1 atau 2 kali  
*1 or 2 times*
- c. 3 hingga 9 kali  
*3 or 9 times*
- d. 10 hingga 19 kali  
*10 to 19 times*
- e. 20 kali atau lebih  
*20 or more times*

58. Dalam tempoh 30 hari yang lepas, berapa kali anda menggunakan ganja?

*During the past 30 days, how many times have you used marijuana?*

- a. 0 kali  
*0 times*
- b. 1 atau 2 kali  
*1 or 2 times*
- c. 3 hingga 9 kali  
*3 or 9 times*
- d. 10 hingga 19 kali  
*10 to 19 times*
- e. 20 kali atau lebih  
*20 or more times*

59. Sepanjang hidup anda, berapa kali anda telah menggunakan amfetamin atau metamfetamin (meth, syabu, ice, chase the dragon)?

*During your life, how many times have you used amphetamines or metamphetamines (meth, syabu, ice, chase the dragon)?*

- a. 0 kali  
*0 times*
- b. 1 atau 2 kali  
*1 or 2 times*
- c. 3 hingga 9 kali  
*3 or 9 times*
- d. 10 hingga 19 kali  
*10 to 19 times*
- e. 20 kali atau lebih  
*20 or more times*

|                                                       |                  |
|-------------------------------------------------------|------------------|
| TINJAUAN KESIHATAN REMAJA<br>ADOLESCENT HEALTH SURVEY | <b>NHMS 2017</b> |
|-------------------------------------------------------|------------------|

**BAHAGIAN 9**  
**PART 9**
**SILA BACA PERNYATAAN DI BAWAH:**

5 soalan berikutnya adalah berkenaan hubungan seksual. Hubungan seksual adalah perlakuan seks yang melibatkan memasukkan zakar ke dalam faraj atau dubur.

**PLEASE READ THE STATEMENT BELOW:**

*The next 5 questions ask about sexual intercourse. Sexual intercourse is defined as sexual acts of penetration of penis into vagina or anus.*

60. Pernahkah anda melakukan hubungan seksual/persetubuhan dalam 30 hari yang lepas ?

*Have you ever had sexual intercourse in the past 30 days?*

- a. Ya  
Yes
- b. No  
Tidak

61. Berapa umur anda ketika kali pertama melakukan hubungan seksual/persetubuhan?

*How old were you when you had sexual intercourse for the first time?*

- a. Saya tidak pernah melakukan hubungan seksual/persetubuhan  
*I have never had sexual intercourse*
- b. 11 tahun atau ke bawah  
*11 years old or younger*
- c. 12 tahun  
*12 years old*
- d. 13 tahun  
*13 years old*
- e. 14 tahun  
*14 years old*
- f. 15 tahun  
*15 years old*
- g. 16 tahun atau ke atas  
*16 years old or older*

62. Sepanjang hidup anda, berapa ramai orang yang telah anda lakukan hubungan seksual/persetubuhan?

*During your life, with how many people have you had sexual intercourse?*

- a. Saya tidak pernah melakukan hubungan seksual/persetubuhan  
*I have never had sexual intercourse*
- b. 1 orang  
*1 person*
- c. 2 orang  
*2 people*
- d. 3 orang  
*3 people*
- e. 4 orang  
*4 people*
- f. 5 orang  
*5 people*
- g. 6 orang atau lebih  
*6 or more people*

63. Kali terakhir anda melakukan hubungan seksual/persetubuhan; adakah anda atau pasangan anda menggunakan kondom?

*The last time you had sexual intercourse; did you or your partner use a condom?*

- a. Saya tidak pernah melakukan hubungan seksual/persetubuhan  
*I have never had sexual intercourse*
- b. Ya  
Yes
- c. Tidak  
No

|                                                                     |                  |
|---------------------------------------------------------------------|------------------|
| <b>TINJAUAN KESIHATAN REMAJA</b><br><b>ADOLESCENT HEALTH SURVEY</b> | <b>NHMS 2017</b> |
|---------------------------------------------------------------------|------------------|

64. Kali terakhir anda melakukan hubungan seksual/persetubuhan, adakah anda atau pasangan anda menggunakan kaedah pencegahan kehamilan lain seperti teknik pancutan luar, masa selamat, pil pencegah kehamilan, ataupun kaedah lain?

*The last time you had sexual intercourse, did you or your partner use any other method of birth control, such as withdrawal, safe time, birth control pills, or any other method to prevent pregnancy?*

- a. Saya tidak pernah melakukan hubungan seksual/persetubuhan  
*I have never had sexual intercourse*
- b. Ya  
*Yes*
- c. Tidak  
*No*
- d. Tidak tahu  
*I do not know*

## TINJAUAN KESIHATAN REMAJA | NHMS 2017

### ADOLESCENT HEALTH SURVEY

#### BAHAGIAN 10 PART 10

##### SILA BACA PERNYATAAN DI BAWAH:

3 soalan seterusnya adalah berkenaan aktiviti fizikal. Aktiviti fizikal adalah apa-apa aktiviti yang meningkatkan kadar denyutan jantung dan menyebabkan kita bernafas dengan kuat. Aktiviti fizikal boleh dilakukan dalam sukan, bermain dengan kawan, atau berjalan ke sekolah. Contoh aktiviti fizikal termasuklah berlari, berjalan pantas, berbasikal, menari, dan bola sepak.

##### PLEASE READ THE STATEMENT BELOW:

*The next 3 questions ask about physical activity. Physical activity is any activity that increases your heart rate and makes you breathe hard. Physical activity can be done in sports, playing with friends, or walking to school. Some examples of physical activity are running, fast walking, biking, dancing, and football.*

65. Dalam tempoh 7 hari yang lepas, berapa hari anda melakukan aktiviti fizikal untuk sekurang-kurangnya 60 minit setiap hari? **JUMLAHKAN MASA ANDA MELAKUKAN APA-APA AKTIVITI FIZIKAL SETIAP HARI**

*During the past 7 days, on how many days were you physically active for a total of at least 60 minutes per day? **ADD UP ALL THE TIME YOU SPENT IN ANY KIND OF PHYSICAL ACTIVITY EACH DAY***

- a. 0 hari  
0 days
- b. 1 hari  
1 day
- c. 2 hari  
2 days
- d. 3 hari  
3 days
- e. 4 hari  
4 days
- f. 5 hari  
5 days
- g. 6 hari  
6 days
- h. 7 hari  
7 days

66. Dalam tempoh 7 hari yang lepas, berapa hari anda berjalan kaki atau berbasikal ke sekolah atau balik ke rumah?  
*During the past 7 days, on how many days did you walk or ride a bicycle to or from school?*

- a. 0 hari  
0 days
- b. 1 hari  
1 day
- c. 2 hari  
2 days
- d. 3 hari  
3 days
- e. 4 hari  
4 days
- f. 5 hari  
5 days
- g. 6 hari  
6 days
- h. 7 hari  
7 days

|                                                                                        |
|----------------------------------------------------------------------------------------|
| <b>TINJAUAN KESIHATAN REMAJA</b><br><b>ADOLESCENT HEALTH SURVEY</b>   <b>NHMS 2017</b> |
|----------------------------------------------------------------------------------------|

**SILA BACA PERNYATAAN DIBAWAH:**

Soalan berikutnya adalah berkenaan masa yang anda habiskan dengan duduk semasa tidak di sekolah atau semasa membuat kerja rumah.

**PLEASE READ THE STATEMENT BELOW:**

*The next question asks about the time you spend mostly sitting when you are not in school or doing homework.*

67. Biasanya berapa masa yang anda habiskan untuk duduk sama ada untuk menonton televisyen, bermain permainan komputer, berbual dengan kawan atau apa-apa aktiviti yang memerlukan anda duduk?

*How much time do you spend during a typical or usual day sitting and watching television, playing computer games, talking with friends, or doing other sitting activities?*

- a. Kurang dari 1 jam sehari  
*Less than 1 hour per day*
- b. 1 hingga 2 jam sehari  
*1 to 2 hours per day*
- c. 3 hingga 4 jam sehari  
*3 to 4 hours per day*
- d. 5 hingga 6 jam sehari  
*5 to 6 hours per day*
- e. 7 hingga 8 jam sehari  
*7 to 8 hours per day*
- f. Lebih dari 8 jam sehari  
*More than 8 hours per day*

## TINJAUAN KESIHATAN REMAJA | NHMS 2017

### ADOLESCENT HEALTH SURVEY

#### BAHAGIAN 11 PART 11

**6 soalan seterusnya adalah berkenaan pengalaman anda di sekolah dan di rumah.  
The next 6 questions ask about your experiences at school and at home.**

68. Dalam tempoh 30 hari yang lepas, berapa hari anda tidak hadir ke kelas atau sekolah tanpa kebenaran?

*During the past 30 days, on how many days did you miss classes or school without permission?*

- a. 0 hari  
*0 days*
- b. 1 atau 2 hari  
*1 or 2 days*
- c. 3 hingga 5 hari  
*3 to 5 days*
- d. 6 hingga 9 hari  
*6 to 9 days*
- e. 10 hari atau lebih  
*10 or more days*

69. Dalam tempoh 30 hari yang lepas, berapa kerap rakan sekolah anda bersikap baik hati dan suka membantu?

*During the past 30 days, how often were most of the students in your school kind and helpful?*

- a. Tidak pernah  
*Never*
- b. Jarang-jarang  
*Rarely*
- c. Kadang-kadang  
*Sometimes*
- d. Kebanyakan masa  
*Most of the time*
- e. Sentiasa  
*Always*

70. Dalam tempoh 30 hari yang lepas, berapa kerap ibu bapa atau penjaga anda menyemak kerja sekolah anda?

*During the past 30 days, how often did your parents or guardians check to see if your homework was done?*

- a. Tidak pernah  
*Never*
- b. Jarang-jarang  
*Rarely*
- c. Kadang-kadang  
*Sometimes*
- d. Kebanyakan masa  
*Most of the time*
- e. Sentiasa  
*Always*

71. Dalam tempoh 30 hari yang lepas, berapa kerap ibu bapa atau penjaga anda cuba memahami masalah dan kebimbangan anda?

*During the past 30 days, how often did your parents or guardians try to understand your problems and worries?*

- a. Tidak pernah  
*Never*
- b. Jarang-jarang  
*Rarely*
- c. Kadang-kadang  
*Sometimes*
- d. Kebanyakan masa  
*Most of the time*
- e. Sentiasa  
*Always*



|                                                                                        |
|----------------------------------------------------------------------------------------|
| <b>TINJAUAN KESIHATAN REMAJA</b><br><b>ADOLESCENT HEALTH SURVEY</b>   <b>NHMS 2017</b> |
|----------------------------------------------------------------------------------------|

72. Dalam tempoh 30 hari yang lepas, berapa kerap ibu bapa atau penjaga anda benar-benar tahu apa yang anda lakukan pada masa lapang?

*During the past 30 days how often did your parents or guardians really know what you were doing with your free time?*

- a. Tidak pernah  
*Never*
- b. Jarang-jarang  
*Rarely*
- c. Kadang-kadang  
*Sometimes*
- d. Kebanyakan masa  
*Most of the time*
- e. Sentiasa  
*Always*

73. Dalam tempoh 30 hari yang lepas, berapa kerap ibu bapa atau penjaga anda memeriksa barangan anda tanpa kebenaran?

*During the past 30 days, how often did your parents or guardians go through your things without your approval?*

- a. Tidak pernah  
*Never*
- b. Jarang-jarang  
*Rarely*
- c. Kadang-kadang  
*Sometimes*
- d. Kebanyakan masa  
*Most of the time*
- e. Sentiasa  
*Always*

|                                                                     |                  |
|---------------------------------------------------------------------|------------------|
| <b>TINJAUAN KESIHATAN REMAJA</b><br><b>ADOLESCENT HEALTH SURVEY</b> | <b>NHMS 2017</b> |
|---------------------------------------------------------------------|------------------|

**BAHAGIAN 12**  
**PART 12**
**Penggunaan internet di kalangan remaja.**  
***The use of internet among adolescents.***

74. Adakah anda melayari internet dalam 30 hari yang lepas?  
*Did you surf the internet in the past 30 days?*

- a. Ya  
Yes
- b. Tidak (Terus ke BAHAGIAN 13, soalan No. 78)  
No (Go to PART 13, question No. 78)

75. Apakah alat yang anda gunakan bagi melayari internet?  
*Which devices that you use for surfing internet?*

75.1 Telefon pintar/ *smartphone*

- a. Ya/Yes
- b. Tidak/No

75.2 Komputer, Komputer Riba/  
*Computer, Laptop, Notebook*

- a. Ya/Yes
- b. Tidak/No

75.3 Papan Elektronik Mudah Alih/  
*Tablet, Ipad*

- a. Ya/Yes
- b. Tidak/No

76. Pernahkah anda belajar menggunakan internet dengan bijak dari.....?

*Have you ever learned how to use the internet wisely from.....?*

76.1 Ibubapa/penjaga/ *parents/guardian*

- a. Ya/Yes
- b. Tidak/No

76.2 Guru/ *teacher*

- a. Ya/Yes
- b. Tidak/No

76.3 Kawan/ *friend*

- a. Ya/Yes
- b. Tidak/No

76.4 Lain-lain sumber (cth: melalui pembelajaran sendiri, kempen/iklan)  
*Other sources (eg: through self-learning, campaign/advertisement)*

- a. Ya/Yes
- b. Tidak/No

## TINJAUAN KESIHATAN REMAJA | NHMS 2017

### ADOLESCENT HEALTH SURVEY

77. Ujian saringan penggunaan internet.

*Internet usage screening test.*

Arahan: Sila nilaikan setiap soalan dengan menggunakan pilihan "a" sehingga "e" daripada skala dibawah untuk menilai ketepatan fakta tersebut bagi diri anda dalam tempoh **30 HARI YANG LALU**. Sila bulatkan jawapan anda untuk semua soalan.

|      |                                                                                                                                                                                                                                                                                                           | Tidak pernah | Kadang-kadang | Agak Kerap | Sederhana Kerap | Sangat Kerap |
|------|-----------------------------------------------------------------------------------------------------------------------------------------------------------------------------------------------------------------------------------------------------------------------------------------------------------|--------------|---------------|------------|-----------------|--------------|
| 77.1 | Berapa kerapkah anda mendapati yang anda melayari internet lebih lama dari masa yang dirancang?<br><i>How often do you find that you stay on-line longer than you intended?</i>                                                                                                                           | a            | b             | c          | d               | e            |
| 77.2 | Berapa kerapkah anda mengabaikan tugas pelajaran/ kerja rumah anda untuk menghabiskan lebih banyak masa melayari internet?<br><i>How often do you neglect household chores to spend more time on-line?</i>                                                                                                | a            | b             | c          | d               | e            |
| 77.3 | Berapa kerapkah anda memilih keseronokan internet berbanding hubungan rapat yang terjalin dengan kawan/pasangan anda?<br><i>How often do you prefer the excitement of the Internet to intimacy with your partner?</i>                                                                                     | a            | b             | c          | d               | e            |
| 77.4 | Berapa kerapkah anda memulakan hubungan baru dengan pengguna internet yang lain?<br><i>How often do you form new relationships with fellow on-line users?</i>                                                                                                                                             | a            | b             | c          | d               | e            |
| 77.5 | Berapa kerapkah orang-orang didalam hidup anda mengadu kepada anda mengenai jumlah masa yang anda gunakan untuk melayari internet?<br><i>How often do others in your life complain to you about the amount of time you spend on-line?</i>                                                                 | a            | b             | c          | d               | e            |
| 77.6 | Berapa kerapkah pelajaran kamu terjejas (cth. ponteng kelas, menangguhkan kerja, tidak menyiapkan tugas tepat pada masa, dll) disebabkan oleh masa yang anda habiskan untuk melayari internet?<br><i>How often do your grades or school work suffers because of the amount of time you spend on-line?</i> | a            | b             | c          | d               | e            |
| 77.7 | Berapa kerapkah anda memeriksa email anda sebelum anda melakukan perkara lain?<br><i>How often do you check your email before something else that you need to do?</i>                                                                                                                                     | a            | b             | c          | d               | e            |
| 77.8 | Berapa kerapkah pencapaian akademik atau produktiviti anda terjejas disebabkan oleh penggunaan internet?<br><i>How often does your job performance or productivity suffer because of the Internet?</i>                                                                                                    | a            | b             | c          | d               | e            |
| 77.9 | Berapa kerapkah anda cuba mempertahankan diri atau berahsia apabila seseorang bertanya mengenai aktiviti anda (apa yang anda lakukan) di internet?                                                                                                                                                        | a            | b             | c          | d               | e            |

**TINJAUAN KESIHATAN REMAJA** | **NHMS 2017**  
**ADOLESCENT HEALTH SURVEY**

|       |                                                                                                                                                                                                                                                            |   |   |   |   |   |
|-------|------------------------------------------------------------------------------------------------------------------------------------------------------------------------------------------------------------------------------------------------------------|---|---|---|---|---|
|       | <i>How often do you become defensive or secretive when anyone asks you what you do on-line?</i>                                                                                                                                                            |   |   |   |   |   |
| 77.10 | Berapa kerapkah anda cuba melupakan pemikiran yang terganggu mengenai kehidupan anda dengan pemikiran yang boleh menenangkan di internet?<br><i>How often do you block out disturbing thoughts about your life with soothing thoughts of the Internet?</i> | a | b | c | d | e |
| 77.11 | Berapa kerapkah anda mendapati diri anda tertunggu-tunggu atau mengharapkan untuk segera menggunakan internet lagi apabila anda tidak menggunakannya?<br><i>How often do you find yourself anticipating when you will go on-line again?</i>                | a | b | c | d | e |
| 77.12 | Berapa kerapkah anda merasa bimbang apabila memikirkan kehidupan tanpa internet akan menjadi bosan, kosong dan tidak menyenangkan?<br><i>How often do you fear that life without the Internet would be boring, empty, and joyless?</i>                     | a | b | c | d | e |
| 77.13 | Berapa kerapkah anda marah, menjerit atau menunjukkan reaksi tidak gembira kepada seseorang yang mengganggu anda ketika anda melayari internet?<br><i>How often do you snap, yell, or act annoyed if someone bothers you while you are on-line?</i>        | a | b | c | d | e |
| 77.14 | Berapa kerapkah anda kurang tidur disebabkan melayari internet hingga lewat malam?<br><i>How often do you lose sleep due to late-night log-ins?</i>                                                                                                        | a | b | c | d | e |
| 77.15 | Berapa kerapkah anda asyik terfikir tentang internet atau berkhayal melayarinya walaupun anda tidak menggunakan internet pada masa itu?<br><i>How often do you feel preoccupied with the Internet when off-line, or fantasize about being on-line?</i>     | a | b | c | d | e |
| 77.16 | Berapa kerapkah anda berkata kepada diri sendiri "sekejap lagi/ beberapa minit lagi" apabila anda melayari internet?<br><i>How often do you find yourself saying "just a few more minutes" when on-line?</i>                                               | a | b | c | d | e |
| 77.17 | Berapa kerapkah anda cuba untuk mengurangkan masa anda melayari internet tetapi tidak berjaya?<br><i>How often do you try to cut down the amount of time you spend on-line and fail?</i>                                                                   | a | b | c | d | e |
| 77.18 | Berapa kerapkah anda cuba menyorokkan daripada orang lain mengenai jumlah masa yang anda gunakan untuk melayari internet?<br><i>How often do you try to hide how long you've been on-line?</i>                                                             | a | b | c | d | e |
| 77.19 | Berapa kerapkah anda memilih untuk menghabiskan lebih banyak masa melayari internet berbanding keluar bersosial dengan rakan-rakan anda?                                                                                                                   | a | b | c | d | e |

|                                                                                        |
|----------------------------------------------------------------------------------------|
| <b>TINJAUAN KESIHATAN REMAJA</b><br><b>ADOLESCENT HEALTH SURVEY</b>   <b>NHMS 2017</b> |
|----------------------------------------------------------------------------------------|

|       |                                                                                                                                                                                                                                                                                                                               |   |   |   |   |   |
|-------|-------------------------------------------------------------------------------------------------------------------------------------------------------------------------------------------------------------------------------------------------------------------------------------------------------------------------------|---|---|---|---|---|
|       | <i>How often do you choose to spend more time on-line over going out with others?</i>                                                                                                                                                                                                                                         |   |   |   |   |   |
| 77.20 | Berapa kerapkah anda merasa sedih, berperasaan tidak menentu dan gementar apabila tidak melayari internet, di mana semua perasaan ini akan hilang sebaik saja anda menggunakan internet semula?<br><i>How often do you feel depressed, moody or nervous when you are off-line, which goes away once you are back on-line?</i> | a | b | c | d | e |

## TINJAUAN KESIHATAN REMAJA | NHMS 2017

### ADOLESCENT HEALTH SURVEY

#### BAHAGIAN 13 PART 13

##### 78. Saringan Minda Sihat *Healthy Mind Screening*

Sila baca setiap kenyataan di bawah dan **HITAMKAN** jawapan anda pada KERTAS JAWAPAN berdasarkan jawapan **a, b, c,** atau **d** bagi menggambarkan keadaan anda sepanjang minggu yang lalu. Tiada jawapan betul atau salah. Jangan mengambil masa yang terlalu lama untuk menjawab mana-mana kenyataan.

*Please read each statement and **SHADE** numbers **a, b, c,** or **d** which indicates how much the statement applied to you over the past week. There are no right or wrong answers. Do not spend too much time on any statement.*

Skala pemarkahan adalah seperti berikut:  
*The rating scale is as follow:*

- a. **Tidak langsung** menggambarkan keadaan saya  
*Did not apply to me at all*
- b. **Sedikit atau jarang-jarang** menggambarkan keadaan saya  
*Applied to me to some **degree** or **some of the time***
- c. **Banyak atau kerapkali** menggambarkan keadaan saya  
*Applied to me to a **considerable degree** or a **good part of time***
- d. **Sangat banyak atau sangat kerap** menggambarkan keadaan saya  
*Applied to me **very much**, or **most of the time***

|      |                                                                                                                                                                                                                                                                   |   |   |   |   |
|------|-------------------------------------------------------------------------------------------------------------------------------------------------------------------------------------------------------------------------------------------------------------------|---|---|---|---|
| 78.1 | Saya dapati diri saya sukar ditenteramkan<br><i>I found it hard to wind down</i>                                                                                                                                                                                  | a | b | c | d |
| 78.2 | Saya sedar mulut saya terasa kering<br><i>I was aware of dryness of my mouth</i>                                                                                                                                                                                  | a | b | c | d |
| 78.3 | Saya tidak dapat mengalami perasaan positif sama sekali<br><i>I couldn't seem to experience any positive feeling at all</i>                                                                                                                                       | a | b | c | d |
| 78.4 | Saya mengalami kesukaran bernafas (contohnya pernafasan yang laju, tercungap-cungap walaupun tidak melakukan senaman fizikal)<br><i>I experienced breathing difficulty (e.g. excessively rapid breathing, breathlessness in the absence of physical exertion)</i> | a | b | c | d |
| 78.5 | Saya sukar untuk mendapatkan semangat bagi melakukan sesuatu perkara<br><i>I found it difficult to work up the initiative to do things</i>                                                                                                                        | a | b | c | d |

**TINJAUAN KESIHATAN REMAJA** | **NHMS 2017**  
**ADOLESCENT HEALTH SURVEY**

|       |                                                                                                                                                                                                      |   |   |   |   |
|-------|------------------------------------------------------------------------------------------------------------------------------------------------------------------------------------------------------|---|---|---|---|
| 78.6  | Saya cenderung untuk bertindak keterlaluan dalam sesuatu keadaan<br><i>I tended to over-react to situations</i>                                                                                      | a | b | c | d |
| 78.7  | Saya rasa mengeletar (contohnya pada tangan)<br><i>I experience trembling (e.g. in the hands)</i>                                                                                                    | a | b | c | d |
| 78.8  | Saya rasa saya menggunakan banyak tenaga dalam keadaan cemas<br><i>I felt that I was using a lot of nervous energy</i>                                                                               | a | b | c | d |
| 78.9  | Saya bimbang keadaan di mana saya mungkin menjadi panik dan melakukan perkara yang membodohkan diri sendiri<br><i>I was worried about situation in which I might panic and make a fool of myself</i> | a | b | c | d |
| 78.10 | Saya rasa saya tidak mempunyai apa-apa untuk diharapkan<br><i>I felt that I had nothing to look forward to</i>                                                                                       | a | b | c | d |
| 78.11 | Saya mendapati diri saya semakin gelisah<br><i>I found myself getting agitated</i>                                                                                                                   | a | b | c | d |
| 78.12 | Saya rasa sukar untuk relaks<br><i>I found it difficult to relax</i>                                                                                                                                 | a | b | c | d |
| 78.13 | Saya rasa sedih dan murung<br><i>I felt down-hearted and blue</i>                                                                                                                                    | a | b | c | d |
| 78.14 | Saya tidak dapat menahan sabar dengan perkara yang menghalang saya meneruskan apa yang saya lakukan<br><i>I was intolerant of anything that kept me from getting on with what I was doing</i>        | a | b | c | d |
| 78.15 | Saya rasa hampir-hampir menjadi panik/cemas<br><i>I felt I was close to panic</i>                                                                                                                    | a | b | c | d |
| 78.16 | Saya tidak bersemangat dengan apa jua yang saya lakukan<br><i>I was unable to become enthusiastic about anything</i>                                                                                 | a | b | c | d |
| 78.17 | Saya tidak begitu berharga sebagai seorang individu<br><i>I felt I wasn't worth much as a person</i>                                                                                                 | a | b | c | d |

|                                                                                        |
|----------------------------------------------------------------------------------------|
| <b>TINJAUAN KESIHATAN REMAJA</b><br><b>ADOLESCENT HEALTH SURVEY</b>   <b>NHMS 2017</b> |
|----------------------------------------------------------------------------------------|

|       |                                                                                                                                                                                                                                                                                                             |   |   |   |   |
|-------|-------------------------------------------------------------------------------------------------------------------------------------------------------------------------------------------------------------------------------------------------------------------------------------------------------------|---|---|---|---|
| 78.18 | Saya rasa yang saya mudah tersentuh<br><i>I felt that I was rather touchy</i>                                                                                                                                                                                                                               | a | b | c | d |
| 78.19 | Saya sedar tindakbalas jantung saya walaupun tidak melakukan aktiviti fizikal (contohnya kadar denyutan jantung bertambah, atau denyutan jantung berkurangan)<br><i>I was aware of the action of my heart in the absence of physical exertion (e.g. sense of heart rate increase, heart missing a beat)</i> | a | b | c | d |
| 78.20 | Saya berasa takut tanpa sebab yang munasabah<br><i>I felt scared without any good reason</i>                                                                                                                                                                                                                | a | b | c | d |
| 78.21 | Saya rasa hidup ini tidak bermakna<br><i>I felt that life was meaningless</i>                                                                                                                                                                                                                               | a | b | c | d |



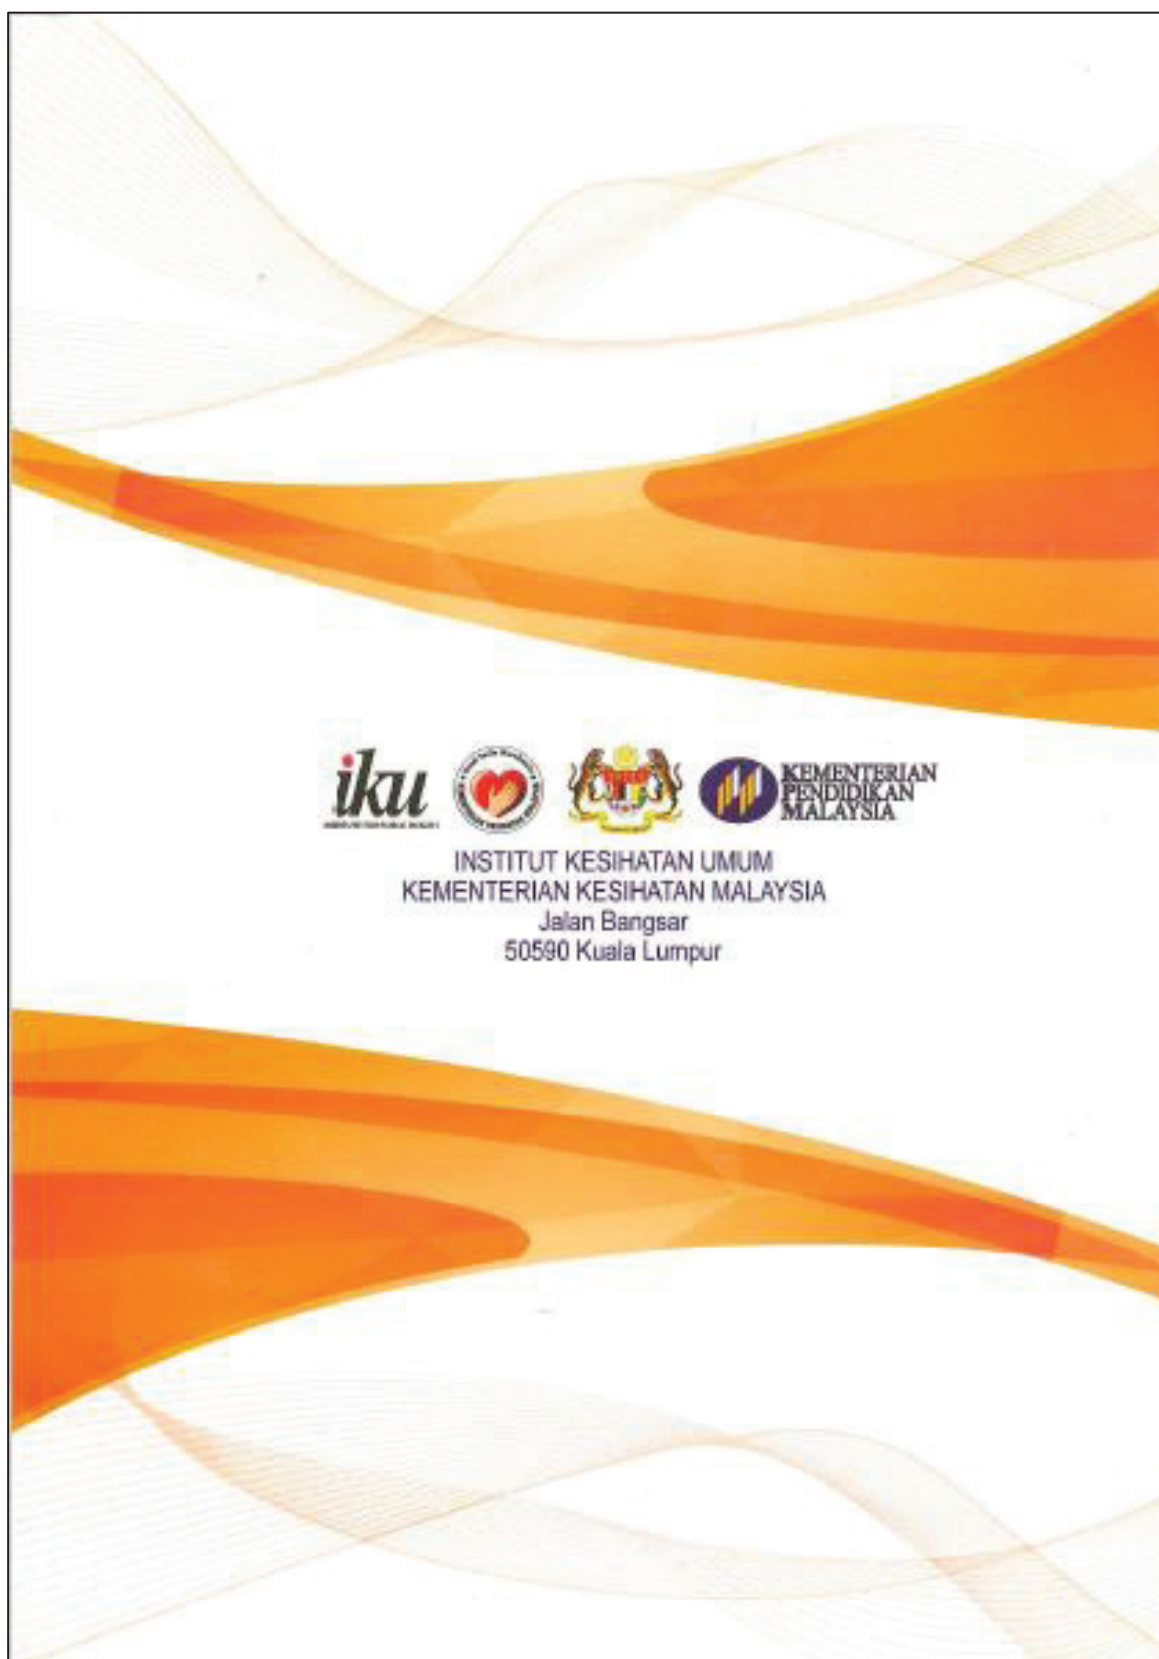

**TINJAUAN KEBANGSAAN KESIHATAN DAN MORBIDITI 2017**  
**KERTAS JAWAPAN TINJAUAN KESIHATAN REMAJA**

**ID PELAJAR**

| NEGERI | STRATA | KATEGORI SEKOLAH | KOD SEKOLAH | KELAS | PELAJAR |
|--------|--------|------------------|-------------|-------|---------|
| 0 0    | 1      | 1                | 0 0         | 0 0   | 0 0     |
| 1 1    | 2      | 2                | 1 1         | 1 1   | 1 1     |
| 2      |        |                  | 2 2         | 2 2   | 2 2     |
| 3      |        |                  | 3           | 3 3   | 3 3     |
| 4      |        |                  | 4           | 4 4   | 4 4     |
| 5      |        |                  | 5           | 5 5   | 5 5     |
| 6      |        |                  | 6           | 6 6   | 6 6     |
| 7      |        |                  | 7           | 7 7   | 7 7     |
| 8      |        |                  | 8           | 8 8   | 8 8     |
| 9      |        |                  | 9           | 9 9   | 9 9     |

  

|       |                 |
|-------|-----------------|
| 1     | A B C D E F G H |
| 2     | A B             |
| 3     | A B C D E F     |
| 4     | A B C D E F     |
| 5     | A B C D E F     |
| 6     | A B C D E       |
| 7     | A B C D E F G   |
| 8     | A B C D E F G   |
| 9     | A B C D E F G   |
| 10    | A B C D E F G   |
| 11    | A B C D E F G   |
| 12    | A B C D E F G H |
| 13    | A B C D E F     |
| 14    | A B C           |
| 15    | A B             |
| 16    | A B C D E       |
| 17    | A B             |
| 18    | A B             |
| 19    | A B C D E       |
| 20    | A B C D E       |
| 21    | A B C D E       |
| 22    | A B C D E F G H |
| 23    | A B C D E F G H |
| 24    | A B C D E F G H |
| 25    | A B C D E F G   |
| 26    | A B C D E F G H |
| 27    | A B C D E F G   |
| 28    | A B C D E F G H |
| 29    | A B C D E F G H |
| 30    | A B C D E F G H |
| 31    | A B C D E       |
| 32    | A B C D E       |
| 33    | A B             |
| 34    | A B             |
| 35    | A B C D E       |
| 36    | A B C D         |
| 37    | A B             |
| 38    | A B C D E F G   |
| 39.1  | A B             |
| 39.2  | A B             |
| 39.3  | A B             |
| 39.4  | A B             |
| 39.5  | A B             |
| 39.6  | A B             |
| 39.7  | A B             |
| 39.8  | A B             |
| 40    | A B C D         |
| 41    | A B C D E       |
| 42    | A B C D E       |
| 43    | A B             |
| 44    | A B C D E F G   |
| 45    | A B C D         |
| 46    | A B C D E       |
| 47    | A B C D E F G   |
| 48    | A B C D E F G   |
| 49    | A B C D E F G   |
| 50    | A B C D E F G   |
| 51    | A B C D         |
| 52    | A B C D         |
| 53    | A B C D E F G   |
| 54    | A B C D E       |
| 55    | A B C D E       |
| 56    | A B C D E F G   |
| 57    | A B C D E       |
| 58    | A B C D E       |
| 59    | A B C D E       |
| 60    | A B             |
| 61    | A B C D E F G   |
| 62    | A B C D E F G   |
| 63    | A B C           |
| 64    | A B C D         |
| 65    | A B C D E F G H |
| 66    | A B C D E F G H |
| 67    | A B C D E F     |
| 68    | A B C D E       |
| 69    | A B C D E       |
| 70    | A B C D E       |
| 71    | A B C D E       |
| 72    | A B C D E       |
| 73    | A B C D E       |
| 74    | A B             |
| 75.1  | A B             |
| 75.2  | A B             |
| 75.3  | A B             |
| 76.1  | A B             |
| 76.2  | A B             |
| 76.3  | A B             |
| 76.4  | A B             |
| 77.1  | A B C D E       |
| 77.2  | A B C D E       |
| 77.3  | A B C D E       |
| 77.4  | A B C D E       |
| 77.5  | A B C D E       |
| 77.6  | A B C D E       |
| 77.7  | A B C D E       |
| 77.8  | A B C D E       |
| 77.9  | A B C D E       |
| 77.10 | A B C D E       |
| 77.11 | A B C D E       |
| 77.12 | A B C D E       |
| 77.13 | A B C D E       |
| 77.14 | A B C D E       |
| 77.15 | A B C D E       |
| 77.16 | A B C D E       |
| 77.17 | A B C D E       |
| 77.18 | A B C D E       |
| 77.19 | A B C D E       |
| 77.20 | A B C D E       |

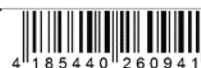

Supplement: s1 [file s1]
